# Supplementary material for: Cryptic deletions are a common finding in “balanced” reciprocal and complex chromosome rearrangements: a study of 59 patients
Source: HighWire-hosted journal article supplement (doi:10.1136/jmg.2007.052787), 2007-08-31
Supplement: 4412750webonlytable1.pdf [file 4412750webonlytable1.pdf]

**Supplementary table 1. Parental origin of the deletions in five reciprocal translocations.**

|               | <i>STS name</i> | <i>Position (Mb)</i> | <i>Range</i> |     | <i>Propositus</i> | <i>father</i> | <i>mother</i> | <i>Del origin</i> |
|---------------|-----------------|----------------------|--------------|-----|-------------------|---------------|---------------|-------------------|
| <b>Case 2</b> | D1S400          | 161.2                | 292          |     | 282.58            | 302.07-316.02 | 282.59-286.39 | <b>pat</b>        |
|               | D1S2681         | 161.8                | 205          | 223 | 214.13            | 210.21-218.20 | 210.26-214.11 | <b>pat</b>        |
|               | D1S2799         | 164.8                | 191          | 209 | 194.10            | 190.05-192.07 | 194.04-200    | <b>pat</b>        |
| <b>Case 3</b> | D2S309          | 201.7                | 176          | 204 | 193.44            | 189.34-195.38 | 193.4         | <b>pat</b>        |
| <b>Case 4</b> | D2S2335         | 148.6                | 153          | 173 | 165.20            | 170.88        | 165.19        | <b>pat</b>        |
| <b>Case 7</b> | D2S142          | 156                  | 254          | 266 | 257.58            | 255.55        | 257.53        | <b>pat</b>        |
|               | D9S1779         | 506 kb               | 120          | 144 | 122.81            | 128.44        | 122.73        | <b>pat</b>        |
| <b>Case 8</b> | D6S1595         | 88.46                | 125          | 131 | 123.78            | 121.79        | 121.82-123.77 | <b>pat</b>        |
|               | D6S1644         | 89.68                | 110          | 124 | 105.77            | 109.86-111.89 | 105.79-111.92 | <b>pat</b>        |
