# Supplementary material for: Cryptic deletions are a common finding in “balanced” reciprocal and complex chromosome rearrangements: a study of 59 patients
Source: HighWire-hosted journal article supplement (doi:10.1136/jmg.2007.052787), 2007-08-31
Supplement: 4412750webonlytable3.pdf [file 4412750webonlytable3.pdf]

**Supplementary table 3. Definition of the deletion breakpoints by custom array-CGH in seven cases with CCRs.\***

| case                       | Last present probe | First deleted probe | Size (bp) | Last deleted probe       | First present probe | Size (bp) |
|----------------------------|--------------------|---------------------|-----------|--------------------------|---------------------|-----------|
| <b>PROXIMAL BREAKPOINT</b> |                    |                     |           | <b>DISTAL BREAKPOINT</b> |                     |           |
| 42 chr.13                  | 38,424,805         | 38,425,739          | 934       | 41,584,272               | 41,584,776          | 504       |
| 43 chr.4                   | 144,739,260        | 144,739,715         | 455       | 147,230,945              | 147,231,355         | 410       |
| 45 chr.18                  | 37,449,354         | 37,449,869          | 515       | 38,502,229               | 38,502,488          | 259       |
| 47 chr.4                   | 168,151,549        | 168,152,975         | 1426      | 169,559,872              | 169,560,813         | 941       |
| 47 chr.11                  | 46,262,486         | 46,262,997          | 511       | 46,894,644               | 46,895,443          | 799       |
| 49 chr.4                   | 173,348,140        | 173,348,630         | 490       | 175,649,430              | 175,650,960         | 1530      |
| 49 chr.4                   | 179,161,593        | 179,163,446         | 1853      | 179,979,486              | 179,980,450         | 964       |
| 50 chr.6                   | 108,228,956        | 108,232,380         | 3424      | 111,694,448              | 111,694,811         | 363       |
| 50 chr.11                  | 88,287,991         | 88,299,437          | 11446     | 94,140,125               | 94,140,467          | 342       |
| 51 chr.1                   | 103,146,735        | 103,147,223         | 488       | 106,498,911              | 106,499,367         | 456       |
| 51 chr.2                   | 181,978,746        | 181,979,546         | 800       | 184,990,778              | 184,991,262         | 484       |

\*The table shows the precise chromosomal position of the two probes, one present and one deleted, flanking the proximal and the distal breakpoints for each deletion, and the genomic distance that separates them. Map positions refer to the Genome Assembly May 2004 (BUILD 35).
